# Supplementary material for: Demographics and Health Behavior of Video Game and eSports Players in Germany: The eSports Study 2019
Source: PubMed Central journal article supplement (PMC7142975; doi:10.3390/ijerph17061870), 2020-03-13
Supplement: ijerph-17-01870-s001.pdf [file ijerph-17-01870-s001.pdf]

## Effect sizes:

### Kruskal Wallis tests

Age: Statistical significant difference between

- amateurs and occasional players:  $r=0.15$
- amateurs and former professional players:  $r=0.20$
- amateurs and current professional players:  $r=0.14$

Sleep time: Statistical significant difference between

- former and current professional players:  $r=0.42$

### ANCOVA

Video game play time: overall partial  $\eta^2=0.03$

### Fisher's exact tests

Gender: Statistical significant difference between

- former professional players and occasional players:  $\varphi_c=0.23$
- amateurs and regular players:  $\varphi_c=0.11$
- amateurs and occasional players:  $\varphi_c=0.22$
- regular players and occasional players:  $\varphi_c=0.08$

Employment: Statistical significant difference between

- former and current professional players:  $\varphi_c=0.42$
- current professional players and regular players:  $\varphi_c=0.08$
- current professional players and occasional players:  $\varphi_c=0.25$
- former professional players and amateurs:  $\varphi_c=0.13$
- former professional players and regular players:  $\varphi_c=0.09$
- amateurs and occasional players:  $\varphi_c=0.10$

Structured training: Statistical significant difference between

- current professional players and regular players:  $\varphi_c=0.21$
- former professional players and regular players:  $\varphi_c=0.27$
- amateurs and regular players:  $\varphi_c=0.51$
